# Supplementary material for: A newly designed sticker-plastic sheet platform and smartphone-based digital imaging for protein assay in food samples with downscaling Kjeldahl digestion
Source: Royal Society of Chemistry journal article supplement (doi:10.1039/d1ra04321h), 2021-01-01
Supplement: d1ra04321h1.pdf [file d1ra04321h1.pdf]

## Supplementary Materials

### A Newly Designed Sticker-Plastic Sheet Platform and Smartphone-Based Digital Imaging for Protein Assay in Food Samples with Downscaling Kjeldahl Digestion

Pirom Didpinrum,<sup>ab</sup> Watsaka Siriangkawut,<sup>\*c</sup> Kraingkrai Ponghong,<sup>c</sup> Piyanete Chantiratikul<sup>c</sup> and Kate Grudpan<sup>\*ab</sup>

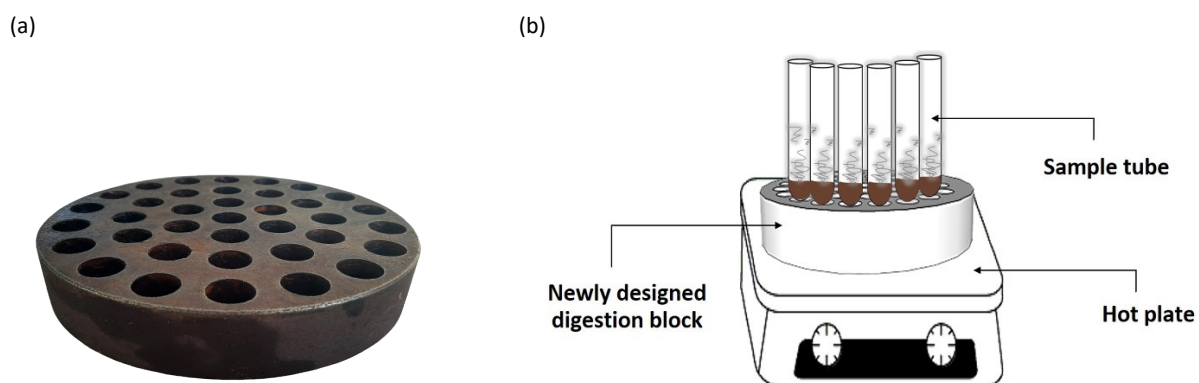

Fig. S1 (a) The newly designed digestion block and (b) its position on the hot plate for the digestion.

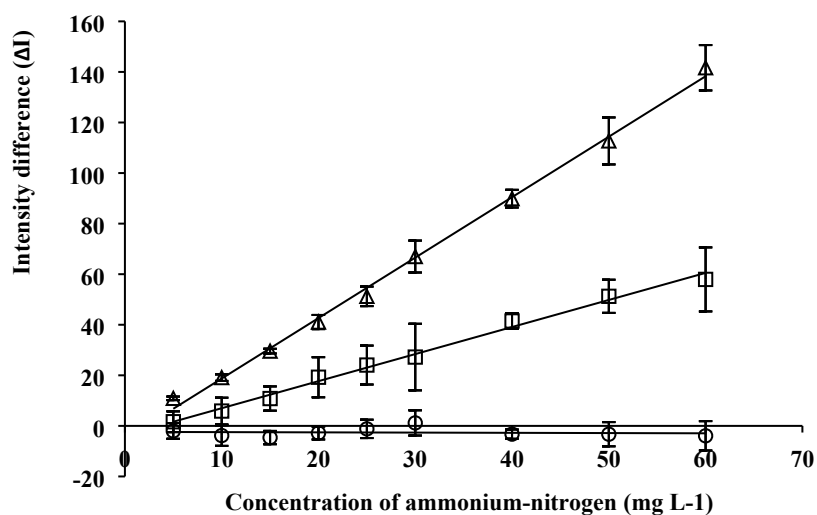

Fig. S2 The RGB intensity difference ( $\Delta I$ ) of the reaction zone for the determination and of ammonium-nitrogen 5 – 60  $\text{mg L}^{-1}$ ; red intensity ( $\circ$ ), green intensity ( $\square$ ), blue intensity ( $\Delta$ ).

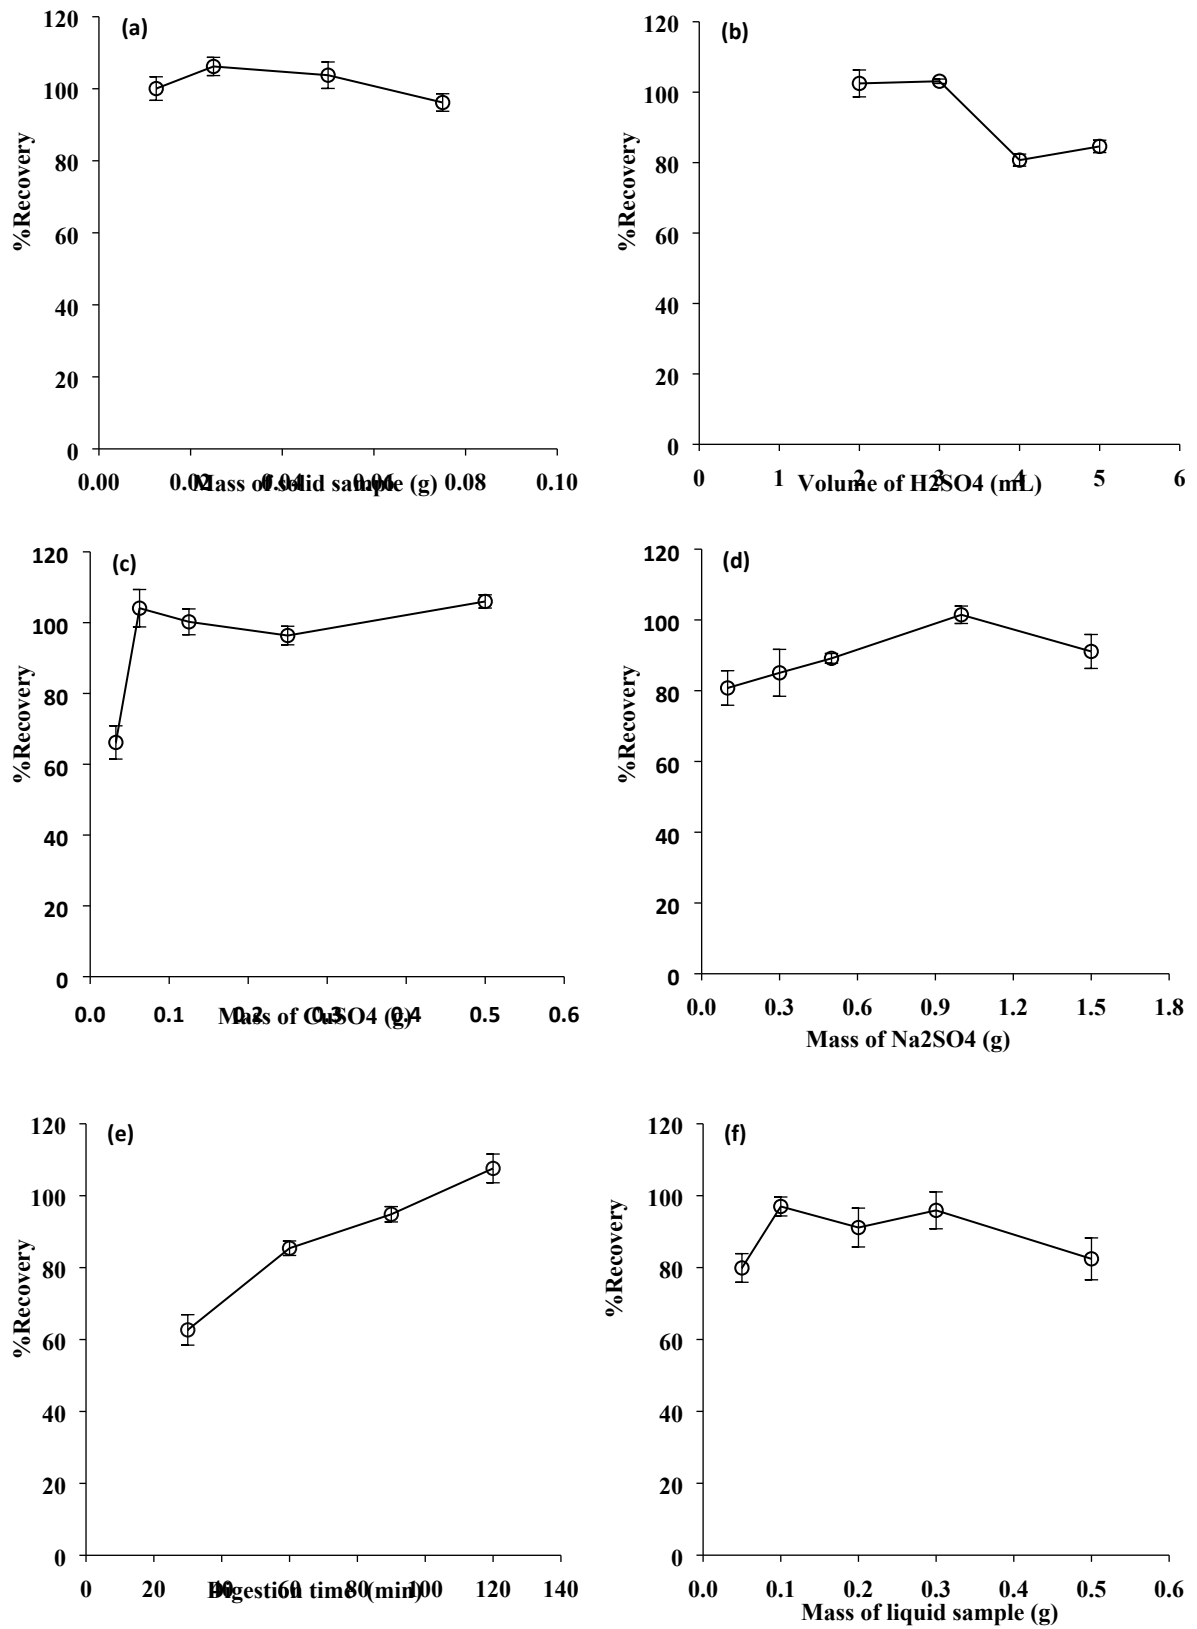

**Fig. S3** Optimization of down scaled Kjeldahl digestion for sample preparation (a) mass of solid sample, (b) volume of H<sub>2</sub>SO<sub>4</sub>, (c) mass of CuSO<sub>4</sub>, (d) mass of Na<sub>2</sub>SO<sub>4</sub>, (e) digestion time and (f) mass of liquid sample.

**Table S1** Literature reports for the determination of protein in food samples

| Sample treatment                                           | Detection method                  | Detection device/reagent                                   | Sample                        | Concentrated acid (mL)                                                      | Linear range (mg L <sup>-1</sup> N) | Limit of detection (mg L <sup>-1</sup> N) | Precision (%RSD) | References |
|------------------------------------------------------------|-----------------------------------|------------------------------------------------------------|-------------------------------|-----------------------------------------------------------------------------|-------------------------------------|-------------------------------------------|------------------|------------|
| Kjeldahl digestion                                         | Kjeldahl                          | Distillation of ammonia and titrimetric                    | Soy sauce                     | 10 mL H <sub>2</sub> SO <sub>4</sub>                                        | -                                   | -                                         | 0.4-1.9          | 16         |
| Kjeldahl digestion                                         | FI-conductometric system          | Conductometric flow through cell                           | Milk and chicken meat         | 7 mL H <sub>2</sub> SO <sub>4</sub>                                         | 10-100                              | 1                                         | 0.3              | 17         |
| Kjeldahl digestion                                         | Digital Image-based Colorimetry   | Colorimetric/ biuret reagent                               | Rice                          | -                                                                           | 5 - 13 g/100g                       | -                                         | -                | 18         |
| Down scaled Kjeldahl digestion                             | FI-conductometric system          | Conductometric flow through cell                           | Northern Thai foods           | 3 mL H <sub>2</sub> SO <sub>4</sub>                                         | 4-100                               | 0.05                                      | 0.04             | 9          |
| Microwave/ultrasound assisted digestion                    | Spectrophotometry                 | Spectrophotometer/ Nessler reagent                         | Rice, polenta, oat and flour  | 10 mL H <sub>2</sub> SO <sub>4</sub> and 5 mL H <sub>2</sub> O <sub>2</sub> | -                                   | -                                         | 0.5–6            | 10         |
| Ultrasound assisted digestion                              | Spectrophotometry                 | Spectrophotometer/ Biuret reagent                          | Maize seeds                   | -                                                                           | 0-4 mg/mL zein                      | -                                         | -                | 11         |
| Precipitation by the salting-out effect                    | Digital Image-based Colorimetry   | Photometric                                                | Milk                          | -                                                                           | 0.36 - 3.6% (w/v)                   | 0.03% (w/v)                               | 3.0              | 12         |
| Precipitation                                              | Spectrophotometry (Lowry)         | Spectrophotometer/ Lowry reagent                           | Milk or whey protein          | -                                                                           | 10-200                              | 8.78                                      | -                | 13         |
| Extraction with chloroform and methanol                    | Spectrophotometry (Bradford)      | Spectrophotometer/ Bradford reagent                        | Cow milk powder               | -                                                                           | 1-5                                 | -                                         | 1.08             | 14         |
| Extraction with phosphate-buffered saline with 0.05% Tween | Spectrophotometry (Bicinchoninic) | Spectrophotometer/ Bicinchoninic reagent                   | Soy and Peanut Oils           | -                                                                           | 2-40                                | -                                         | 2.48             | 15         |
| Down scaled Kjeldahl digestion                             | Digital Image-based Colorimetry   | Miniaturized 96 well sticker-plastic sheet/Nessler reagent | Soyfoods, protein-based foods | 3 mL H <sub>2</sub> SO <sub>4</sub>                                         | 5-60                                | 2.76                                      | 6.7              | This work  |
